# Supplementary material
Source: Springer Nature journal article supplement (https://www.springermedizin.de/resource/supplementary/13063_2013_1378_MOESM1_ESM.pdf/9619864)
Supplement: MOESM1 [file 9619864]

200 patients

Meet inclusion Criteria

Signed informed consent

Baseline evaluation, randomization (1:1)

**RSD group (100)**

persistent AF individual (except intracardiac thrombus) accept **Direct-Current Cardioversion** immediately after RSD

**Control group (100)**

Anti-hypertensive medications and AAD

**Month 3, 6, 9, 12:** ECG, Holter, ABPM, logbook,  
**Month 6, 12:** blood samples, AHI, PWV, SF-36,  
echocardiogram, renal artery CT imaging
